# Supplementary material for: Tuning electronic and magnetic properties of silicene with magnetic superhalogens
Source: Royal Society of Chemistry journal article supplement (doi:10.1039/c4cp02758b), 2014-01-01
Supplement: c4cp02758b1.pdf [file c4cp02758b1.pdf]

## Supplementary Information

### Tuning Electronic and Magnetic Properties of Silicene with Magnetic Superhalogens

Tianshan Zhao,<sup>†</sup> Shunhong Zhang,<sup>†</sup> Qian Wang,<sup>\*\*†‡</sup> Yoshiyuki Kawazoe,<sup>§</sup> and Puru  
Jena<sup>‡</sup>

<sup>†</sup>HEDPS, Center for Applied Physics and Technology, College of Engineering, Peking  
University, Beijing 100871, China

<sup>‡</sup>Department of Physics, Virginia Commonwealth University, Richmond, Virginia  
23284, United States

<sup>§</sup> Institute for Material Research, Tohoku University, Sendai, 980-8577, Japan

\* Email: qianwang2@pku.edu.cn

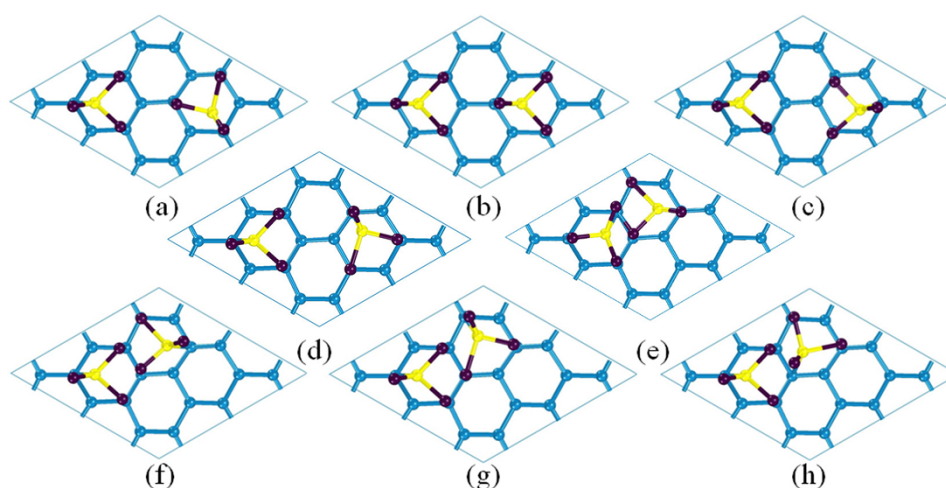

**Fig. S1** Eight initial configurations of the  $2\text{MnCl}_3$ -adsorbed silicene where the two superhalogens on the same side of silicene.

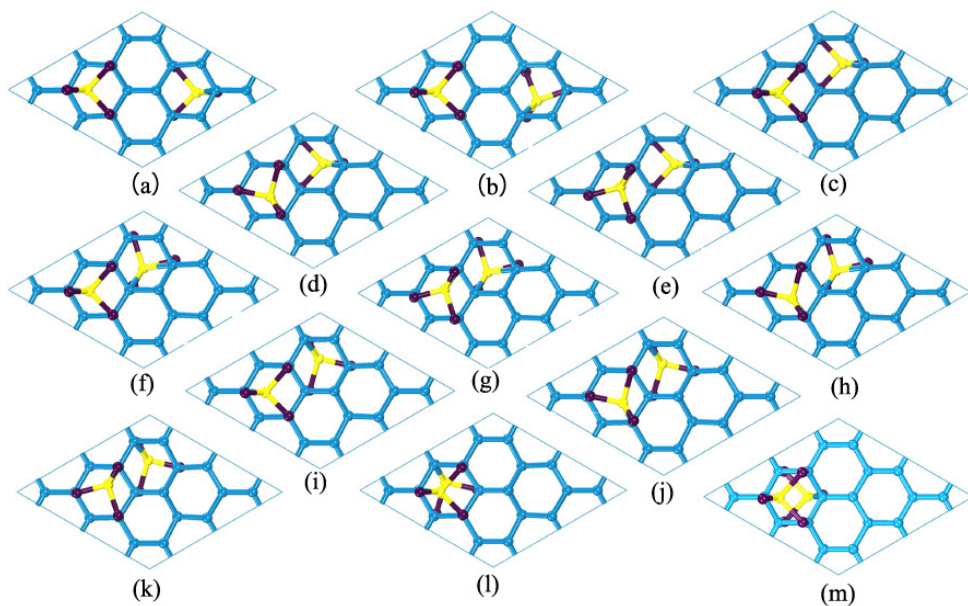

**Fig. S2** Thirteen initial configurations of the  $2\text{MnCl}_3$ -adsorbed silicene where the two superhalogens on the opposite sides of silicene.

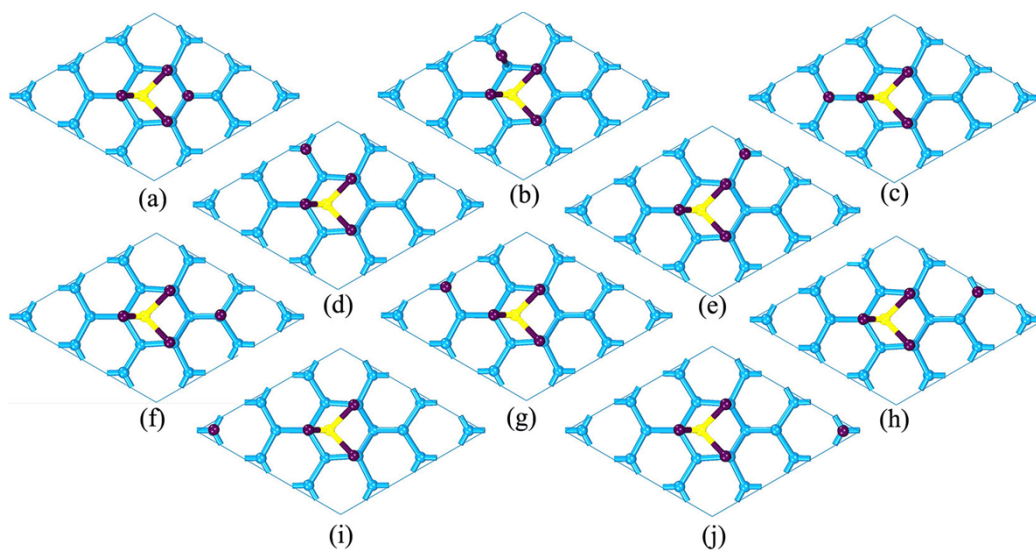

**Fig. S3** Ten initial configurations of the MnCl<sub>3</sub> and Cl co-adsorbed silicene where both the Cl atom and MnCl<sub>3</sub> molecule are on the same side of silicene.

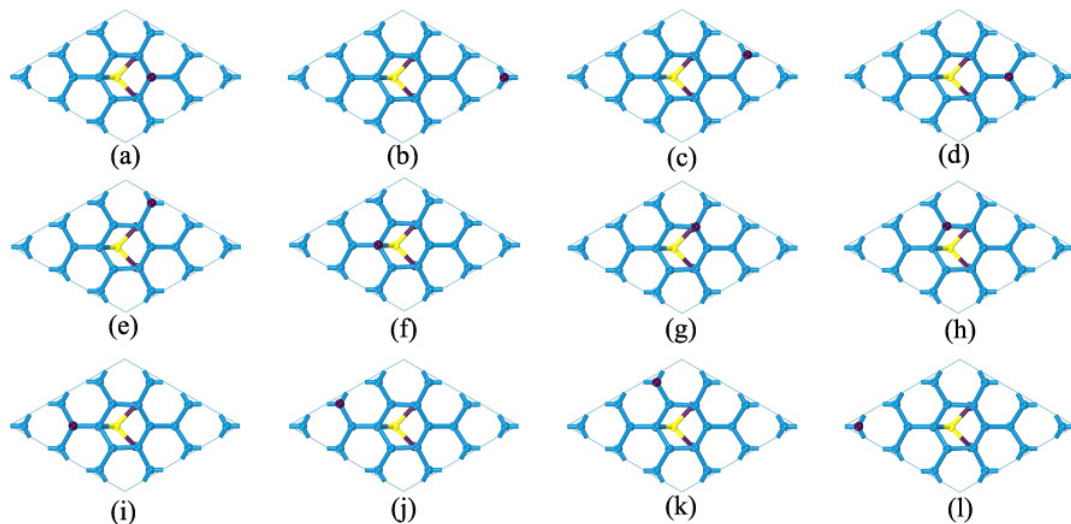

**Fig. S4** Twelve initial configurations of MnCl<sub>3</sub> and Cl co-adsorbed silicene where the Cl atom and MnCl<sub>3</sub> are on the opposite sites of silicene.

Coordinates of the lowest energy configurations for each adsorption species and coverage in the 3x3 supercell.

1) Modulation with one MnCl<sub>3</sub> molecule:

$a = b = 11.67 \text{ \AA}$ ,  $c = 15 \text{ \AA}$ ,  $\alpha = \beta = 90^\circ$ ,  $\gamma = 120^\circ$

|    |      |        |        |        |
|----|------|--------|--------|--------|
| Si | Si1  | 0.2853 | 0.0639 | 0.5548 |
| Si | Si2  | 0.4062 | 0.2889 | 0.5954 |
| Si | Si3  | 0.6220 | 0.0639 | 0.5564 |
| Si | Si4  | 0.7247 | 0.2877 | 0.5797 |
| Si | Si5  | 0.9515 | 0.0606 | 0.5659 |
| Si | Si6  | 0.2851 | 0.3926 | 0.5543 |
| Si | Si7  | 0.3944 | 0.6176 | 0.5602 |
| Si | Si8  | 0.6161 | 0.3961 | 0.5285 |
| Si | Si9  | 0.7240 | 0.6060 | 0.5953 |
| Si | Si10 | 0.9483 | 0.3903 | 0.5559 |

|    |      |        |        |        |
|----|------|--------|--------|--------|
| Si | Si11 | 0.2813 | 0.7312 | 0.5496 |
| Si | Si12 | 0.6194 | 0.7269 | 0.5554 |
| Si | Si13 | 0.9488 | 0.7272 | 0.5542 |
| Si | Si14 | 0.3968 | 0.9525 | 0.5784 |
| Si | Si15 | 0.7281 | 0.9496 | 0.5904 |
| Si | Si16 | 0.0647 | 0.9476 | 0.5873 |
| Si | Si17 | 0.0626 | 0.2842 | 0.5898 |
| Si | Si18 | 0.0599 | 0.6155 | 0.5779 |
| Cl | Cl19 | 0.3982 | 0.3083 | 0.7428 |
| Cl | Cl20 | 0.7067 | 0.6139 | 0.7430 |
| Cl | Cl21 | 0.3966 | 0.6220 | 0.8126 |
| Mn | Mn22 | 0.4699 | 0.5467 | 0.7053 |

## 2) Modulation with MnCl<sub>3</sub> in high coverage

Two MnCl<sub>3</sub> adsorbed on the same side of silicene sheet:

$a = b = 11.67 \text{ \AA}$ ,  $c = 15 \text{ \AA}$ ,  $\alpha = \beta = 90^\circ$ ,  $\gamma = 120^\circ$

|    |      |        |        |        |
|----|------|--------|--------|--------|
| Si | Si1  | 0.0964 | 0.2221 | 0.5689 |
| Si | Si2  | 0.2258 | 0.4504 | 0.6010 |
| Si | Si3  | 0.4330 | 0.2237 | 0.5577 |
| Si | Si4  | 0.5502 | 0.4531 | 0.5888 |
| Si | Si5  | 0.7640 | 0.2231 | 0.5759 |
| Si | Si6  | 0.1024 | 0.5586 | 0.5772 |
| Si | Si7  | 0.2052 | 0.7756 | 0.5403 |
| Si | Si8  | 0.4322 | 0.5505 | 0.5270 |
| Si | Si9  | 0.5365 | 0.7604 | 0.5944 |
| Si | Si10 | 0.7615 | 0.5440 | 0.5220 |
| Si | Si11 | 0.0902 | 0.8893 | 0.5453 |
| Si | Si12 | 0.4266 | 0.8775 | 0.5577 |
| Si | Si13 | 0.7634 | 0.8856 | 0.5591 |

|    |      |        |        |        |
|----|------|--------|--------|--------|
| Si | Si14 | 0.2067 | 0.1074 | 0.5811 |
| Si | Si15 | 0.5402 | 0.1076 | 0.5594 |
| Si | Si16 | 0.8745 | 0.1051 | 0.5961 |
| Si | Si17 | 0.8697 | 0.4543 | 0.6038 |
| Si | Si18 | 0.8672 | 0.7642 | 0.5691 |
| Cl | Cl19 | 0.2239 | 0.4709 | 0.7465 |
| Cl | Cl20 | 0.5118 | 0.7791 | 0.7400 |
| Cl | Cl21 | 0.1828 | 0.7616 | 0.8084 |
| Cl | Cl22 | 0.8503 | 0.4388 | 0.7492 |
| Cl | Cl23 | 0.5439 | 0.4262 | 0.7371 |
| Cl | Cl24 | 0.5549 | 0.1210 | 0.8209 |
| Mn | Mn25 | 0.2759 | 0.7090 | 0.7016 |
| Mn | Mn26 | 0.6148 | 0.2588 | 0.7083 |

Two MnCl<sub>3</sub> adsorbed on the opposite sides of silicene sheet:

$a = b = 11.67 \text{ \AA}$ ,  $c = 15 \text{ \AA}$ ,  $\alpha = \beta = 90^\circ$ ,  $\gamma = 120^\circ$

|    |      |        |        |        |
|----|------|--------|--------|--------|
| Si | Si1  | 0.0939 | 0.2151 | 0.5550 |
| Si | Si2  | 0.2071 | 0.4397 | 0.5846 |
| Si | Si3  | 0.4310 | 0.2177 | 0.5419 |
| Si | Si4  | 0.5429 | 0.4357 | 0.5967 |
| Si | Si5  | 0.7582 | 0.2190 | 0.5437 |
| Si | Si6  | 0.0958 | 0.5500 | 0.5581 |
| Si | Si7  | 0.2066 | 0.7713 | 0.5854 |
| Si | Si8  | 0.4301 | 0.5481 | 0.5627 |
| Si | Si9  | 0.5383 | 0.7710 | 0.5850 |
| Si | Si10 | 0.7597 | 0.5453 | 0.5399 |
| Si | Si11 | 0.0944 | 0.8835 | 0.5536 |
| Si | Si12 | 0.4285 | 0.8834 | 0.5607 |
| Si | Si13 | 0.7626 | 0.8836 | 0.5546 |

|    |      |        |        |        |
|----|------|--------|--------|--------|
| Si | Si14 | 0.2052 | 0.1048 | 0.5810 |
| Si | Si15 | 0.5412 | 0.1092 | 0.5998 |
| Si | Si16 | 0.8710 | 0.1065 | 0.5772 |
| Si | Si17 | 0.8703 | 0.4372 | 0.5978 |
| Si | Si18 | 0.8725 | 0.7713 | 0.5784 |
| Cl | Cl19 | 0.5245 | 0.1370 | 0.7435 |
| Cl | Cl20 | 0.8469 | 0.4563 | 0.7415 |
| Cl | Cl21 | 0.5536 | 0.4485 | 0.8742 |
| Cl | Cl22 | 0.4553 | 0.1995 | 0.3982 |
| Cl | Cl23 | 0.7757 | 0.5166 | 0.3962 |
| Cl | Cl24 | 0.7510 | 0.2019 | 0.2686 |
| Mn | Mn25 | 0.6019 | 0.3834 | 0.7502 |
| Mn | Mn26 | 0.6999 | 0.2704 | 0.3899 |

### 3) Hybrid modulation with MnCl<sub>3</sub> and Cl

The Cl and MnCl<sub>3</sub> co-adsorbed silicene with Cl atom on the same side of MnCl<sub>3</sub>.

$a = b = 11.67 \text{ \AA}$ ,  $c = 15 \text{ \AA}$ ,  $\alpha = \beta = 90^\circ$ ,  $\gamma = 120^\circ$

|    |      |        |        |        |
|----|------|--------|--------|--------|
| Si | Si1  | 0.2860 | 0.0647 | 0.5585 |
| Si | Si2  | 0.4116 | 0.2923 | 0.5937 |
| Si | Si3  | 0.6222 | 0.0662 | 0.5590 |
| Si | Si4  | 0.7253 | 0.2915 | 0.6022 |
| Si | Si5  | 0.9511 | 0.0620 | 0.5660 |
| Si | Si6  | 0.2874 | 0.3932 | 0.5523 |
| Si | Si7  | 0.3952 | 0.6178 | 0.5538 |
| Si | Si8  | 0.6209 | 0.3919 | 0.5248 |
| Si | Si9  | 0.7213 | 0.6016 | 0.5932 |
| Si | Si10 | 0.9481 | 0.3915 | 0.5540 |
| Si | Si11 | 0.2826 | 0.7317 | 0.5442 |
| Si | Si12 | 0.6198 | 0.7261 | 0.5539 |

|    |      |        |        |        |
|----|------|--------|--------|--------|
| Si | Si13 | 0.9487 | 0.7273 | 0.5572 |
| Si | Si14 | 0.3975 | 0.9521 | 0.5752 |
| Si | Si15 | 0.7259 | 0.9490 | 0.5871 |
| Si | Si16 | 0.0638 | 0.9492 | 0.5852 |
| Si | Si17 | 0.0645 | 0.2877 | 0.5851 |
| Si | Si18 | 0.0616 | 0.6159 | 0.5728 |
| Cl | Cl19 | 0.3991 | 0.3097 | 0.7402 |
| Cl | Cl20 | 0.7052 | 0.6137 | 0.7398 |
| Cl | Cl21 | 0.3966 | 0.6213 | 0.8124 |
| Cl | Cl22 | 0.7350 | 0.2970 | 0.7423 |
| Mn | Mn23 | 0.4679 | 0.5479 | 0.7030 |

The Cl and MnCl<sub>3</sub> co-adsorbed silicene with Cl on the opposite sides of MnCl<sub>3</sub>.

$a = b = 11.67 \text{ \AA}, c = 15 \text{ \AA}, \alpha = \beta = 90^\circ, \gamma = 120^\circ$

|    |      |        |        |        |
|----|------|--------|--------|--------|
| Si | Si1  | 0.2821 | 0.0607 | 0.5503 |
| Si | Si2  | 0.3931 | 0.2843 | 0.5916 |
| Si | Si3  | 0.6201 | 0.0627 | 0.5589 |
| Si | Si4  | 0.7303 | 0.2821 | 0.5913 |
| Si | Si5  | 0.9487 | 0.0631 | 0.5580 |
| Si | Si6  | 0.2825 | 0.3911 | 0.5368 |
| Si | Si7  | 0.3963 | 0.6139 | 0.5687 |
| Si | Si8  | 0.6184 | 0.3936 | 0.5450 |
| Si | Si9  | 0.7288 | 0.6188 | 0.5917 |
| Si | Si10 | 0.9495 | 0.3922 | 0.5584 |
| Si | Si11 | 0.2835 | 0.7291 | 0.5552 |
| Si | Si12 | 0.6198 | 0.7288 | 0.5399 |
| Si | Si13 | 0.9521 | 0.7305 | 0.5496 |
| Si | Si14 | 0.3941 | 0.9516 | 0.5806 |
| Si | Si15 | 0.7266 | 0.9463 | 0.5862 |
| Si | Si16 | 0.0618 | 0.9507 | 0.5814 |

|    |      |        |        |        |
|----|------|--------|--------|--------|
| Si | Si17 | 0.0660 | 0.2855 | 0.5850 |
| Si | Si18 | 0.0609 | 0.6183 | 0.5800 |
| Cl | Cl19 | 0.4088 | 0.3057 | 0.7375 |
| Cl | Cl20 | 0.7097 | 0.6042 | 0.7381 |
| Cl | Cl21 | 0.3950 | 0.6223 | 0.8162 |
| Cl | Cl22 | 0.6111 | 0.4011 | 0.4058 |
| Mn | Mn23 | 0.4725 | 0.5485 | 0.7116 |
